# Supplementary material
Source: PubMed Central journal article supplement (PMC9162499)
Supplement: NIHMS1799109-supplement-Supplemental_Materials.pdf [file NIHMS1799109-supplement-Supplemental_Materials.pdf]

## **SUPPLEMENTAL MATERIALS**

### **Myeloid LXR deficiency induces inflammatory gene expression in foamy macrophages and accelerates atherosclerosis**

Kaori Endo-Umeda<sup>1,2\*</sup>, Eunyoung Kim<sup>1,3</sup>, David G. Thomas<sup>1,6</sup>, Wenli Liu<sup>1</sup>, Huijuan Dou<sup>1</sup>, Mustafa Yalcinkaya<sup>1</sup>, Sandra Abramowicz<sup>1</sup>, Tong Xiao<sup>1</sup>, Per Antonson<sup>4</sup>, Jan-Åke Gustafsson<sup>4,5</sup>, Makoto Makishima<sup>2</sup>, Muredach P. Reilly<sup>3</sup>, Nan Wang<sup>1</sup> and Alan R. Tall<sup>1\*</sup>

<sup>1</sup> Division of Molecular Medicine, Department of Medicine, Columbia University, New York, NY 10032, USA

<sup>2</sup> Division of Biochemistry, Department of Biomedical Sciences, Nihon University School of Medicine, Tokyo, 173-8610, Japan

<sup>3</sup> Division of Cardiology, Department of Medicine, Columbia University, New York, NY 10032, USA

<sup>4</sup> Department of Biosciences and Nutrition, Karolinska Institute, Huddinge, SE-14157, Sweden

<sup>5</sup> Center for Nuclear Receptors and Cell Signaling, University of Houston, Houston, TX 77204, USA

<sup>6</sup> Present Address: Department of Medicine, New York Presbyterian Hospital/Weill Cornell Medicine, New York, NY, USA

**Running Title:** Myeloid LXR on atherosclerosis

#### **\*Corresponding Authors**

Kaori Endo-Umeda, Ph.D.

Division of Molecular Medicine, Department of Medicine,  
Columbia University Irving Medical Center

Division of Biochemistry, Department of Biomedical Sciences,  
Nihon University School of Medicine

Email: [umeda.kaori@nihon-u.ac.jp](mailto:umeda.kaori@nihon-u.ac.jp)

Alan R. Tall, M.B.B.S.

Division of Molecular Medicine, Department of Medicine,  
Columbia University Irving Medical Center

Email: [art1@cumc.columbia.edu](mailto:art1@cumc.columbia.edu)

## Supplemental Methods

### - Immunofluorescent staining and immunohistochemistry

For macrophage staining, paraffin-embedded sections were rehydrated, retrieved antigens and incubated with 1 % goat serum to remove nonspecific antibody binding. Sections were incubated with rat anti-Mac-2 (Galectin-3) (Cedarlane, cat No. CL8942AP, clone No. M3/38, RRID: AB\_10060357, 1:10,000) overnight, and then with goat anti-rat IgG (H+L), CF 647 (Sigma-Aldrich, St. Louis, MO, cat No. SAB4600186, 1:200) for 30 minutes at room temperature, and mounted with ProLong Gold Antifade Mountant with DAPI reagent (Thermo Fisher Scientific). To detect proliferative macrophages, sections were stained with rabbit anti-Ki-67 (Vector Laboratories, Inc. Burlingame, CA, cat No. VP-K451, RRID: AB\_2314701, 1:1,500) and rat anti-Mac-2, and then with Alexa Fluor (AF) 488-conjugated goat anti-rat IgG (Thermo Fisher Scientific, cat No. A-11006, RRID: AB\_141373, 1:1,000) and AF647-conjugated goat anti-rabbit IgG (Thermo Fisher Scientific, cat No. A-21244, RRID: AB\_2535812, 1:1,000). For IL-1 $\beta$  staining, sections were stained with rabbit anti-IL-1 $\beta$  (Novus Biologicals, Centennial, CO, cat No. NB600-633, RRID: AB\_10001060, 1:100) and rat anti-Mac2 and with the same secondary antibodies as for Ki-67 staining. For neutrophil staining, sections were stained with rat anti-Ly6G (BioLegend, cat No. 127602, clone No. 1A8, RRID: AB\_1089180, 1:200), and then with goat anti-rat IgG (H+L), CF 647. To detect NETs formation, sections were stained with biotinylated anti-myeloperoxidase (MPO) (R&D Systems, cat No. BAF3667, RRID: AB\_2146326, 1:30) and anti-Histone H3 (citrulline R2 + R8 + R17) (Abcam, Cambridge, UK, cat No. ab5103, 1:300), and then with AF488-conjugated streptavidin (Thermo Fisher Scientific, cat No. S11223, 1:200) and goat anti-rabbit IgG (H+L), CF 647 (Sigma-Aldrich, St. Louis, MO, cat No. SAB4600184, RRID: AB\_2665437, 1:200). For 15-LOX staining, sections were stained with rabbit anti-15-LOX (Abcam, cat No. ab244205, 1:1,000) and rat anti-Mac-2.

For the staining of lipid peroxidation, paraffin-embedded sections were rehydrated, retrieved antigens and incubated with 1 % goat serum to remove nonspecific antibody bindings. Sections were incubated with anti-4-Hydroxynonenal (HNE) (Abcam, cat No. ab46545, RRID: AB\_722490, 1:500) overnight, and the visualized with ImmPACT DAB substrate solution (Vector Laboratories, Inc. Burlingame, CA).

The stained samples were analyzed with DMI 6000B fluorescent microscopy (Leica Microsystems, Wetzlar, Germany), and the positive area was calculated with ImageJ software in a blind manner between genotypes. One or two sections were analyzed for the staining per each mice. The isotype control staining was shown in Supplemental Fig. 4 or reported previously<sup>47, 48</sup>.

### - Monocyte tracking analysis

*Ldlr*<sup>-/-</sup> mice transplanted with bone marrow cells from floxed control or *MyI-Lxr*<sup>dko</sup>

mice were used after 11-weeks WTD feeding. To remove Gr-1<sup>lo</sup> monocytes transiently, clodronate liposome solution (Liposoma BV, Amsterdam, Netherlands, 200  $\mu$ L per 20 g of body weight) was injected intravenously into mice prior to 72 hours beads injection. Fluorescent-labeled latex beads (Fluoresbrite YG Microspheres 1.00  $\mu$ m) (Polysciences, Inc., Warrington, PA, 1:4 in PBS, 200  $\mu$ L per 20 g of body weight) were injected intravenously, and after 24 hours, the frequency of monocyte labeling was assessed with flowcytometry. Mice were sacrificed 5 days after beads injection. OCT-embedded frozen sections of heart were cut into 8  $\mu$ m width, fixed with 4 % paraformaldehyde (PFA), and stained with rat anti-Mac-2. The number of beads in Mac-2-positive lesion were counted under fluorescent microscopy and normalized with the frequency of beads labeling in Gr-1<sup>hi</sup> monocytes. For detection of blood monocytes, cells were stained with LIVE/DEAD Fixable Near-IR Dead Cell Stain Kit (Thermo Fisher Scientific, 1:1,000), anti-CD16/32 Fc blocker, PE-Cy7-conjugated anti-CD11b, APC-conjugated anti-CD115, and BV421-conjugated anti-Gr-1. We confirmed that beads were selectively incorporated into Gr-1<sup>hi</sup> monocytes. The percentage of beads-positive Gr-1<sup>hi</sup> monocytes (Beads<sup>+</sup>Gr-1<sup>hi</sup> cells in CD115<sup>+</sup>CD11b<sup>+</sup>-gated cells) was analyzed with BD FACS Canto II (BD Biosciences, San Jose, CA) and calculated with FlowJo 10.4 software (Tree Star, Ashland, OR).

#### **- Western blotting**

The CD11b<sup>+</sup> cells were isolated from splenocytes using magnetic beads (Miltenyi Biotec, Cologne, Germany), Western blot analysis was performed with rat anti-Caspase-1 (Thermo Fisher Scientific, cat No. 14-9832-82, clone No. 5B10, RRID: AB\_2016691, 1:250) and visualized with an enhanced chemiluminescence detection system.

#### **- Cell sorting**

For sorting of lymphocytes and myeloid cells from spleen or blood, splenocytes or blood leukocytes were isolated after filtration with 40  $\mu$ m nylon mesh and removal of red blood cells. Cells were stained with anti-CD16/32 Fc blocker (BioLegend, San Diego, CA, cat No. 101302, clone No. 93, RRID: AB\_312801, 1:30), allophycocyanin (APC)-Cy7-conjugated anti-CD45 (BioLegend, cat No. 103116, clone No. 30-F11, RRID: AB\_312981, 1:100), phycoerythrin (PE)-Cy7-conjugated anti-CD11b (BioLegend, cat No. 101216, clone No. M1/70, RRID: AB\_312799, 1:200), Brilliant Violet (BV) 421-conjugated anti-Gr-1 (BioLegend, cat No. 108434, clone No. RB6-8C5, RRID: AB\_2562219, 1:200), fluorescein isothiocyanate (FITC)-conjugated anti-B220 (BioLegend, cat No. 103206, clone No. RA3-6B2, RRID: AB\_312991, 1:100), PerCP-Cy5.5-conjugated T cell receptor  $\beta$  (TCR $\beta$ ) (BioLegend, cat No. 109228, clone No. H57-597, RRID: AB\_1575173, 1:100) and APC-conjugated anti-F4/80 (BioLegend, cat No. 123116, clone No. BM8, RRID: AB\_893481, 1:50 for spleen) or APC-conjugated anti-CD115 (BioLegend, cat No. 135532, clone No. AFS98, RRID: AB\_2632740, 1:50 for

blood). Each of CD45<sup>+</sup>-gated leukocytes such as T cells (TCR $\beta$ <sup>+</sup> cells), B cells (B220<sup>+</sup> cells), neutrophils (Gr-1<sup>+</sup>CD11b<sup>+</sup> cells), and monocyte in blood (CD115<sup>+</sup> cells) or macrophages in spleen (F4/80<sup>+</sup> cells) was sorted by FACSARIA cell sorter (BD Biosciences).

For single cell RNA-sequencing, the digested aortic cells pooled from 10 mice for each group were incubated with LIVE/DEAD Fixable Near-IR Dead Cell Stain Kit, anti-CD16/32 Fc blocker, Pacific Blue-conjugated anti-CD45 and propidium iodide (PI) (Supplemental Fig. 5A). Living CD45<sup>+</sup> cells (LIVE/DEAD-PI<sup>-</sup>CD45<sup>+</sup> cells) were sorted with FACSARIA cell sorter.

For Sorting of foamy or nonfoamy macrophages, digested aortic cells isolated from *Ldlr*<sup>-/-</sup> male mice transplanted with bone marrow cells from floxed control or *Myf-Lxr*<sup>dko</sup> on 20-weeks WTD feeding were used for the experiment. Cells were incubated with LIVE/DEAD Fixable Near-IR Dead Cell Stain Kit, anti-CD16/32 Fc blocker, Pacific Blue-conjugated anti-CD45, PE-Cy7-conjugated anti-CD11b and APC-conjugated anti-CD64 (BioLegend, cat No. 139306, clone No. X54-5/7.1, RRID: AB\_11219391, 1:50). Intracellular neutral lipid was stained with BODIPY 493/503 (4,4-Difluoro-1,3,5,7,8-pentamethyl-4-bora-3a,4a-diaza-S-indacene) (Thermo Fisher Scientific, 40  $\mu$ M in PBS) for 30 minutes. Stained cells were subjected to FACSARIA cell sorter, and separated to CD45<sup>+</sup>-gated CD64<sup>+</sup>CD11b<sup>+</sup>BODIPY<sup>hi</sup>SSC<sup>hi</sup> cells (foamy macrophages), CD64<sup>+</sup>CD11b<sup>+</sup>BODIPY<sup>lo</sup>SSC<sup>lo</sup> cells (nonfoamy macrophages) and CD64<sup>-</sup>CD11b<sup>+</sup> cells (mixed fraction of monocytes and neutrophils).

#### **- Intracellular lipid staining in atherosclerotic plaque**

For Oil red O staining, frozen sections were fixed with 4 % PFA for 15 minutes and stained with Oil red O reagent in isopropanol for 5 minutes. Sections were counterstained with Hematoxylin QS reagent (Vector Laboratories, Inc.) and mounted with VectaMount AQ Aqueous Mounting Medium (Vector Laboratories, Inc.). For BODIPY staining, frozen sections were fixed with 4 % PFA for 15 minutes and stained with rat anti-Mac-2 or rat anti-TREM-2 (Sigma-Aldrich, cat No. MABN755, clone No. 78, 1:100) overnight, and with goat anti-rat IgG (H+L), CF 647 for 30 minutes, and then incubated with BODIPY (40 nM in PBS) for 30 minutes.

**Table S1 Mouse primer sequences for quantitative PCR analysis**

| Gene Symbol    | Accession No. |     | Sequence [5' -> 3']              | Amplicon Size (bp) |
|----------------|---------------|-----|----------------------------------|--------------------|
| <i>Nr1h3</i>   | NM_013839     | Fw  | AAACAGCTCCCTGGCTTCCT             | 102                |
|                |               | Rev | GTACCTCCGTGACGTCTCCA             |                    |
| <i>Nr1h2</i>   | NM_009473     | Fw  | AGATGGATGCCTTCATGCGG             | 133                |
|                |               | Rev | TCCGAATCTGCTCCTCAGAGA            |                    |
| <i>Alox15</i>  | NM_009660     | Fw  | GTGTCCCCCTGATGACTTGG             | 112                |
|                |               | Rev | CATTCCCACCACGTACCGAT             |                    |
| <i>Saa3</i>    | NM_011315     | Fw  | TTTCTCTTCCTGTTGTTCCCAGTC         | 120                |
|                |               | Rev | TCACAAGTATTTATTCAGCACATTG<br>GGA |                    |
| <i>Marco</i>   | NM_010766     | Fw  | CTGTGCGCATGCTCGGTTAC             | 119                |
|                |               | Rev | TGCAGTCCCACAAACTGTTC             |                    |
| <i>Cxcl13</i>  | NM_018866     | Fw  | GGCCACGGTATTCTGGAAGC             | 75                 |
|                |               | Rev | ACCGACAACAGTTGAAATCACTC          |                    |
| <i>Sectmla</i> | NM_145373     | Fw  | GGCAGCAGTGGAGGTAACAT             | 99                 |
|                |               | Rev | GGACAGGAGGCCTTAGGAGA             |                    |
| <i>Tst</i>     | NM_009437     | Fw  | ACAACCGGAGCCGGATATAG             | 105                |
|                |               | Rev | GGGCTCTTCTCGAAGCCATC             |                    |
| <i>Irg1</i>    | NM_008392     | Fw  | GCAACATGATGCTCAAGTCTG            | 96                 |
|                |               | Rev | TGCTCCTCCGAATGATACCA             |                    |
| <i>Ccl22</i>   | NM_009137     | Fw  | TCTTGCTGTGGCAATTCAGA             | 92                 |
|                |               | Rev | GAGGGTGACGGATGTAGTCC             |                    |
| <i>Trem2</i>   | NM_031254     | Fw  | ACAGCACCTCCAGGAATCAAG            | 82                 |
|                |               | Rev | AACTTGCTCAGGAGAACGCA             |                    |
| <i>ApoE</i>    | NM_009696     | Fw  | TGCTGTTGGTCACATTGCTGA            | 186                |
|                |               | Rev | CTTGTGTGACTTGGGAGCTCTG           |                    |
| <i>Lpl</i>     | NM_008509     | Fw  | ATCGGGCCCAGCAACATTAT             | 118                |
|                |               | Rev | TGGACGTTGTCTAGGGGGTA             |                    |
| <i>Ctsl</i>    | NM_009984     | Fw  | TTAGTGCAGAGTGGCACCAG             | 175                |
|                |               | Rev | ATGTCACCGAAGGCGTTCAT             |                    |
| <i>Lipa</i>    | NM_021460     | Fw  | CCACTCCCAGGAAGATGCAA             | 166                |
|                |               | Rev | GACCGAGTGTTCCCTCACCAG            |                    |
| <i>Npc2</i>    | NM_023409     | Fw  | CCTATTCCTGAGCCTGACGG             | 134                |
|                |               | Rev | AGTTTCCATTCCACCACCAGT            |                    |
| <i>Ppib</i>    | NM_023409     | Fw  | GGAGATGGCACAGGAGGAA              | 76                 |
|                |               | Rev | GCCCGTAGTGCTTCAGCTT              |                    |

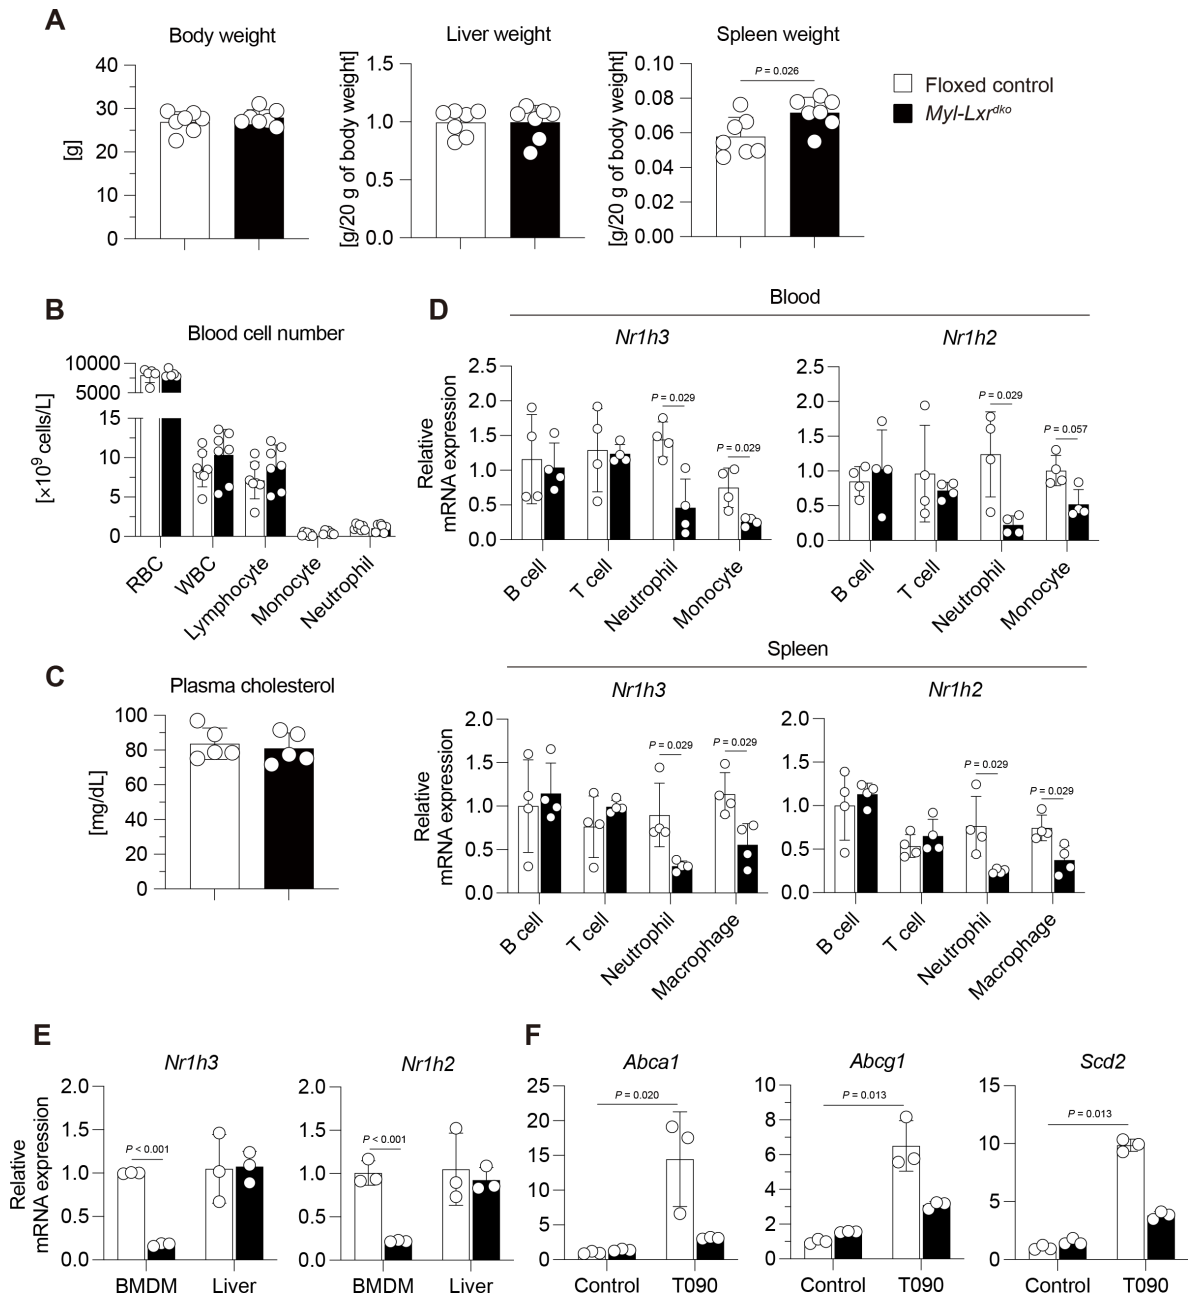

**Fig. S1 Myeloid cell-specific LXR $\alpha$ / $\beta$ -deficient mice.** Body weight, liver weight or spleen weight (**A**), blood cell counts (**B**) and plasma total cholesterol levels (**C**) in male floxed control or *MyI-Lxr<sup>dko</sup>* mice on normal laboratory diet-fed condition. (n = 7 for each group). (**D**) Gene expression of *Nr1h3* or *Nr1h2* in lymphocyte (B cells or T cells) and myeloid cells (neutrophils, and monocyte or macrophages) sorted from whole blood or spleen. (n = 4 for each group). Statistical analysis was performed by Mann-Whitney U test. (**E**) Expression of *Nr1h3* or *Nr1h2* in bone marrow-derived macrophages (BMDMs) or whole liver. Statistical analysis was performed by unpaired Student *t*-tests. (**F**) Ligand-dependent LXR target gene expression in macrophages. BMDMs were treated with dimethyl sulfoxide (DMSO, control) or T0901317 (T090, 1  $\mu$ M) for 16 hours (n = 4 for each group). The expression of *Abca1*, *Abcg1* and *Scd-2* were evaluated by qPCR. Statistical analysis was performed by Kruskal-Wallis test followed by Dunn's multiple comparisons. All data are shown as mean  $\pm$  SD and white dots indicate individual values.

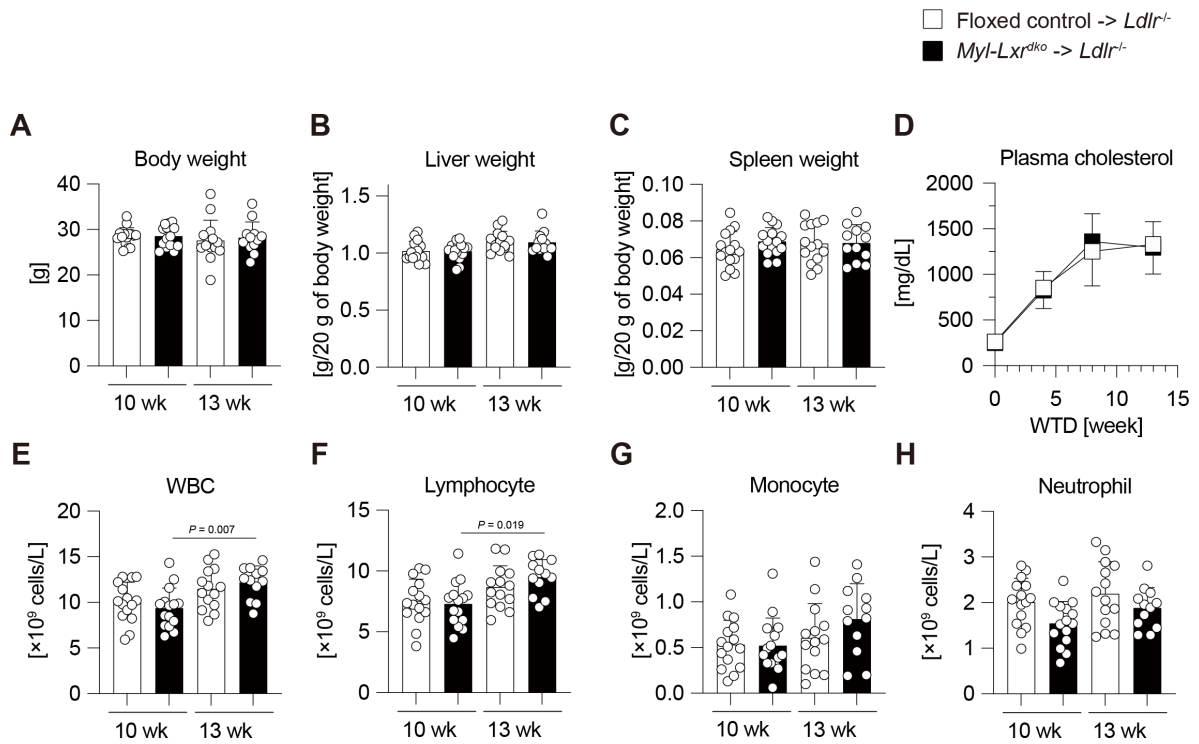

**Fig. S2 Tissue weight and blood white blood cell contents in atherosclerosis mice.** *Ldlr*<sup>-/-</sup> mice were transplanted with bone marrow cells from floxed control or *Myl-Lxr*<sup>dko</sup> mice after WTD feeding for 10 or 13 weeks (n = 13-15 for each group). (A) Body weight, (B) liver weight and (C) spleen weight per 20 g of body weight. (D) Plasma total cholesterol levels during WTD feeding. (E-H) The number of total white blood cells (WBC), lymphocytes, monocytes and neutrophils were measured with complete blood cell tests. Statistical analysis was performed by Kruskal-Wallis test followed by Dunn's multiple comparisons. All data are shown as mean  $\pm$  SD and white dots indicate individual values.



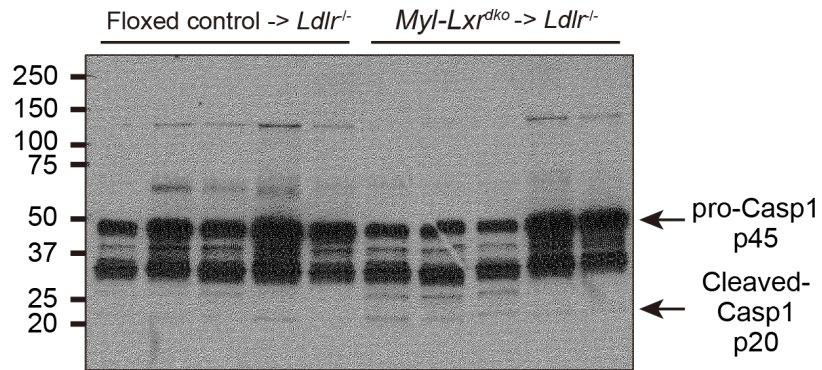

**Fig. S3 Inflammasome activation in splenic CD11b<sup>+</sup> cells.** The CD11b<sup>+</sup> cells were isolated from spleen of *Ldlr*<sup>-/-</sup> mice transplanted with bone marrow cells from floxed control or *Myl-Lxr*<sup>dKO</sup> mice after WTD feeding for 10 weeks (n = 5 for each group). The levels of cleaved form of Caspase-1 were assessed by western blotting using anti-caspase-1 antibody.

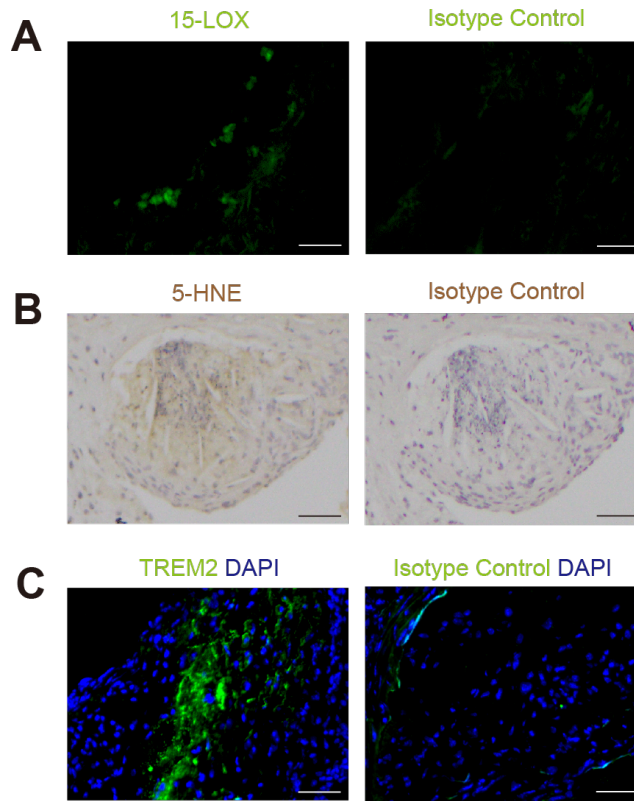

**Fig. S4 Isotype control staining for 15-LOX, 4-HNE and TREM2.** (A) Paraffin section of aortic root was stained with anti-15-LOX antibody or isotype control antibody (anti-rabbit IgG), and anti-5-HNE antibody or isotype control antibody (anti-rabbit IgG) (B). (C) Frozen section was stained with anti-TREM2 antibody or isotype control antibody (anti-rat IgG).

**A**

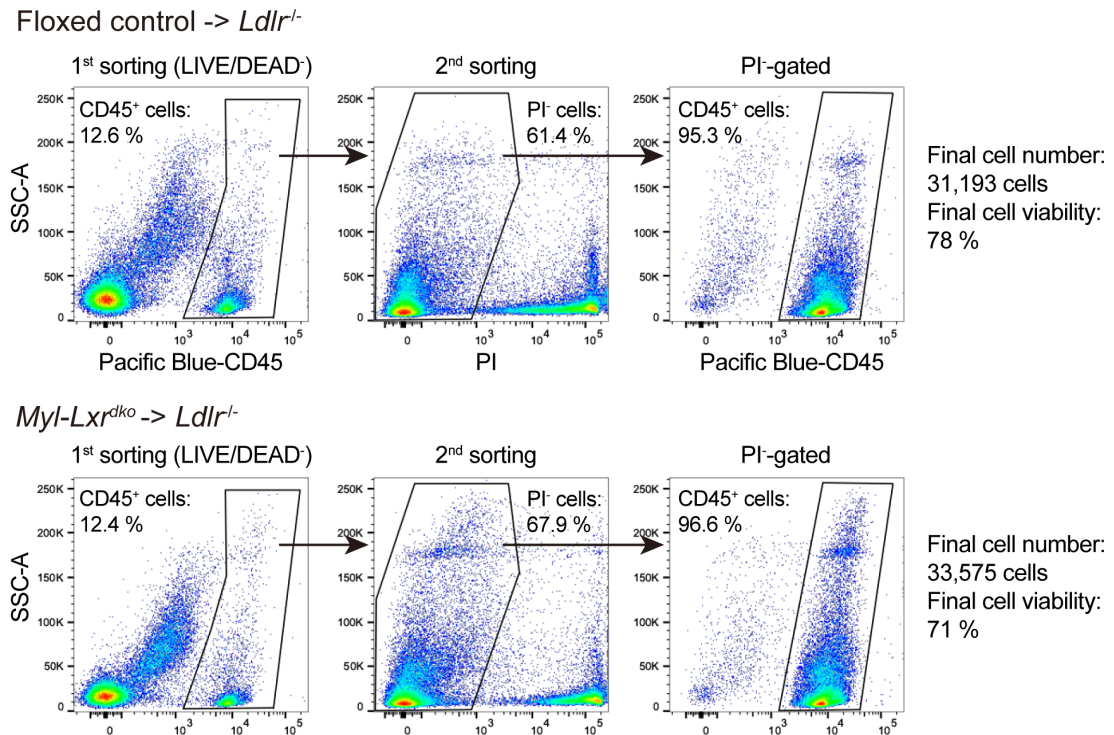

**B**

| Group                                                          | Min # of Cells | Max # of UMI | Min # of Genes | Max # of Genes | Max % of Mitochondrial Reads | Total # of Genes | Total # of Cells |
|----------------------------------------------------------------|----------------|--------------|----------------|----------------|------------------------------|------------------|------------------|
| Floxed Control<br>-> <i>Ldlr</i> <sup>-/-</sup>                | 10             | 25,000       | 200            | 4,000          | 10                           | 14,169           | 3,932            |
| <i>Myl-Lxr</i> <sup>dko</sup><br>-> <i>Ldlr</i> <sup>-/-</sup> | 10             | 25,000       | 200            | 4,000          | 10                           | 14,006           | 2,907            |

**Fig. S5 Sorting of aortic CD45<sup>+</sup> cells for scRNA-seq. (A)** The digested aortic cells pooled from 10 mice for each group were stained with LIVE/DEAD Fixable Near-IR Dead Cell Stain Kit, Pacific Blue-conjugated anti-CD45, and then LIVE/DEAD-PI-CD45<sup>+</sup> cells were sorted with FACSARIA cell sorter (1st sorting). For the second sorting, cells were propidium iodide (PI) and living CD45<sup>+</sup> cells (PI<sup>-</sup>CD45<sup>+</sup> cells) were separated again with cell sorter. After cell sorting, 31,193 cells from floxed control-BMT *Ldlr*<sup>-/-</sup> group (final cell viability: 78 %) or 33,575 cells from *Myl-Lxr*<sup>dko</sup>-BMT *Ldlr*<sup>-/-</sup> mice group (final cell viability: 78 %) were subjected to Chromium library preparation system, respectively. **(B)** The detailed filtering procedure of scRNA analysis.

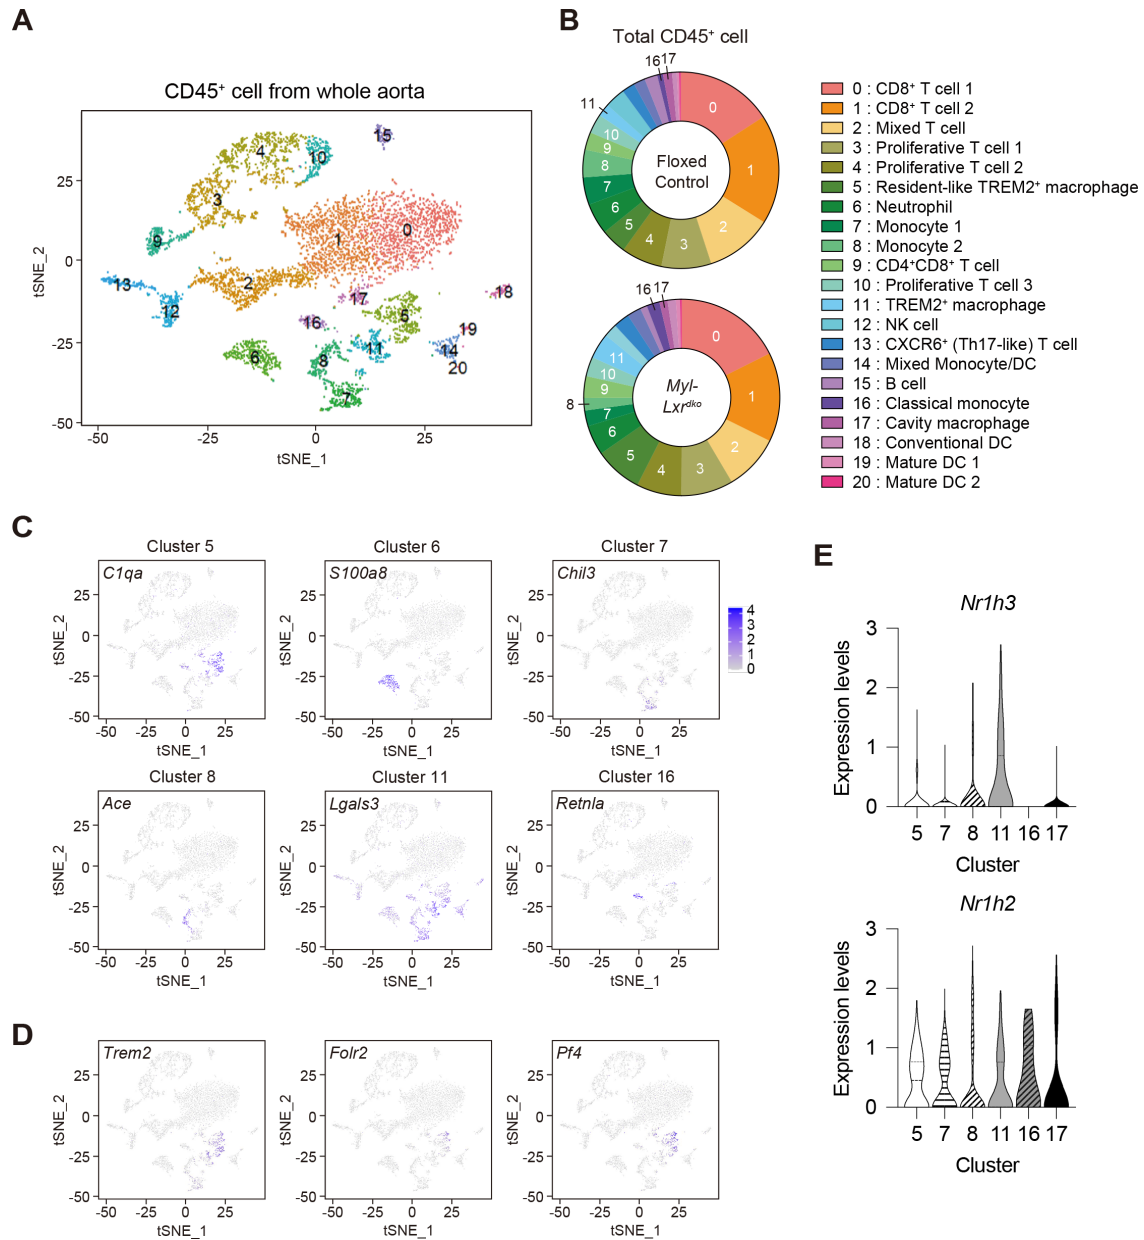

**Fig. S6 Overall population of immune cells in atherosclerotic plaques. (A)** Representative t-distributed stochastic neighbor embedding (tSNE) plot of CD45<sup>+</sup> cells isolated from whole aorta by scRNA-seq analysis. **(B)** Percentage of each cluster (Cl.) in total CD45<sup>+</sup> cells in floxed control- or *Myl-Lxr<sup>dko</sup>*-BMT *Ldlr<sup>-/-</sup>* mice. Each percentage were normalized with total cell number. **(C)** The representative tSNE plots for myeloid cell cluster-specific gene expressions of *C1qa* (cluster 5), *S100a8* (cluster 6), *Chil3* (cluster 7), *Ace* (cluster 8), *Lgals3* (cluster 11) and *Retnla* (cluster 16). **(D)** The representative tSNE plots for macrophage markers, *Trem2*, *Folr2* and *Pf4*. **(E)** Expression of *Nr1h3* (LXR $\alpha$ ) and *Nr1h2* (LXR $\beta$ ) in myeloid cell clusters in floxed control-BMT *Ldlr<sup>-/-</sup>* mice.

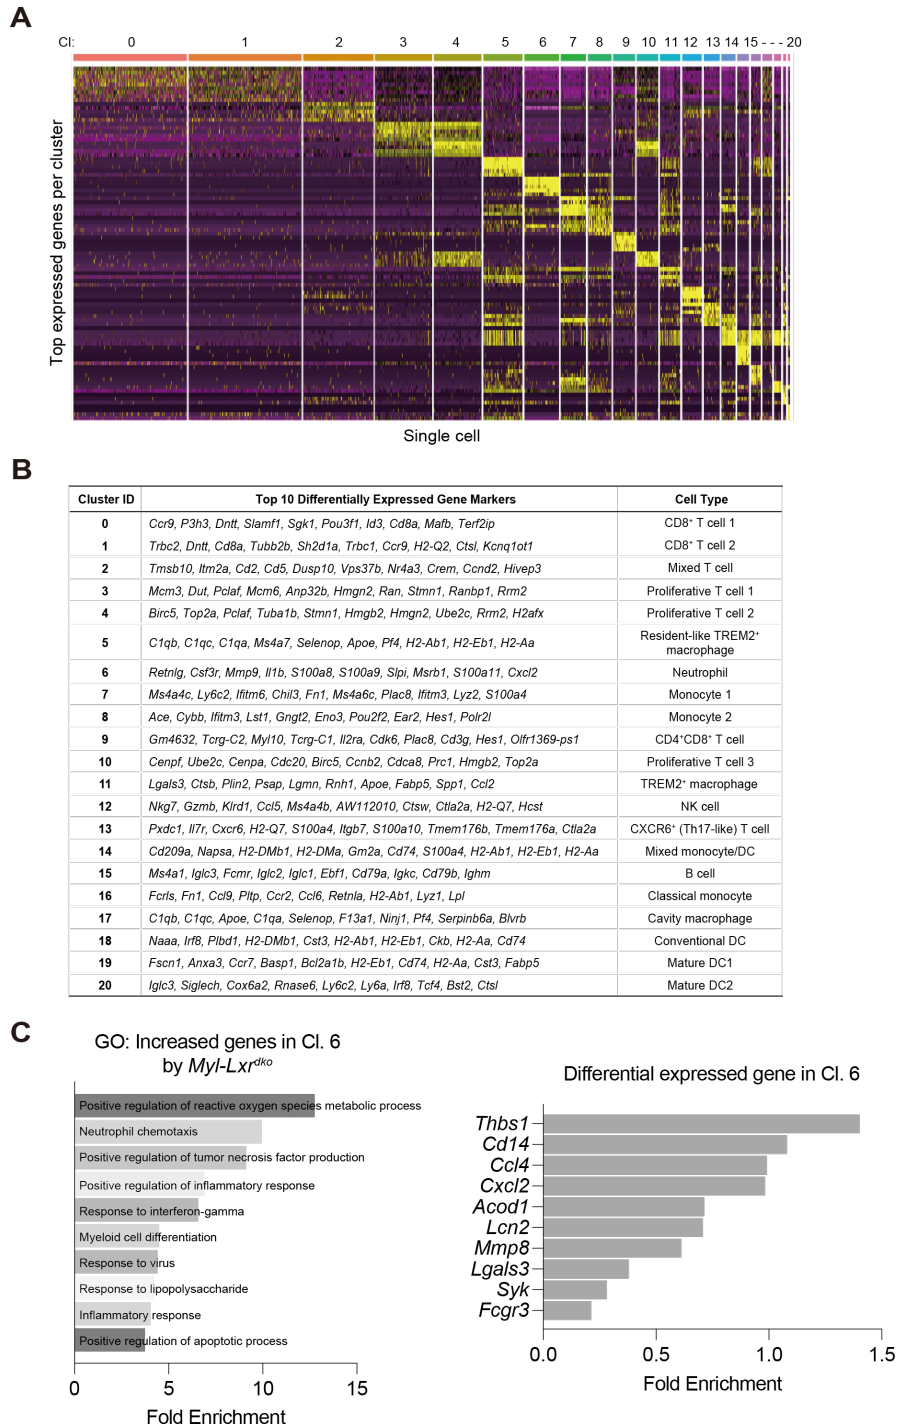

**Fig. S7 Differential gene expression of CD45<sup>+</sup> leukocytes in atherosclerotic plaques. (A)** The heatmap of top expressed genes per each cluster. **(B)** The list of top 10 differentially expressed gene markers per each cluster. **(C)** GO analysis in increased genes by myeloid LXR $\alpha/\beta$  deficiency (> 1.2-fold, Bonferroni-adjusted *P* value < 0.05) and differential expressed genes in cluster 6.

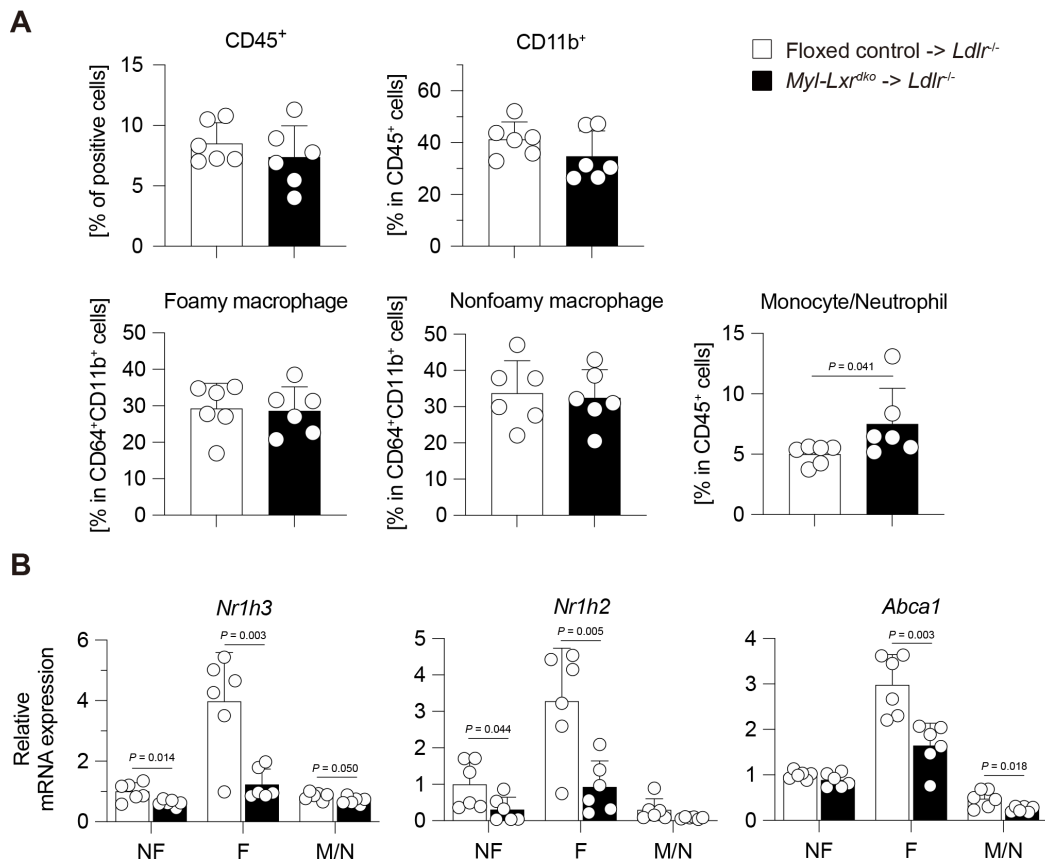

**Fig. S8 Sorting of foamy macrophages, nonfoamy macrophages and monocyte/neutrophils from digested aortic cells. (A)** The population of total CD45<sup>+</sup> cells, CD45<sup>+</sup>-gated CD11b<sup>+</sup> cells, foamy macrophages (CD45<sup>+</sup>-gated CD64<sup>+</sup>CD11b<sup>+</sup>BODIPY<sup>hi</sup>SSC<sup>hi</sup> cells), nonfoamy macrophages (CD45<sup>+</sup>-gated CD64<sup>+</sup>CD11b<sup>+</sup>BODIPY<sup>lo</sup>SSC<sup>lo</sup> cells) and monocyte/neutrophils (CD45<sup>+</sup>-gated CD64<sup>+</sup>CD11b<sup>+</sup> cells) in *Ldlr*<sup>-/-</sup> mice transplanted with bone marrow cells isolated from floxed control- or *Myl-Lxr*<sup>dko</sup>-BMT *Ldlr*<sup>-/-</sup> mice after WTD feeding for 20 weeks (n = 6 for each group). The digested aortic cells were stained with Pacific Blue-conjugated anti-CD45, PE-Cy7-conjugated anti-CD11b, APC-conjugated anti-CD64 and BODIPY. **(B)** Expression of *Nr1h3*, *Nr1h2* and *Abca1* in sorted foamy macrophages, nonfoamy macrophages and mixed cells of monocytes and neutrophils. (n = 6 for each group) All data are shown as mean ± SD and white dots indicate individual values. Statistical analysis was performed by Mann-Whitney U test.

## Major Resources Table

### Animals (in vivo studies)

| Species                                                                                                                                                              | Vendor or Source                                                   | Background Strain | Sex | Persistent ID / URL |
|----------------------------------------------------------------------------------------------------------------------------------------------------------------------|--------------------------------------------------------------------|-------------------|-----|---------------------|
| Mus Musculus<br><i>Nr1h3<sup>floxed/floxed</sup>Nr1h2<sup>floxed/floxed</sup></i><br>( <i>Lxrα<sup>fl/fl</sup>Lxrβ<sup>fl/fl</sup></i> )                             | Jan-Åke Gustafsson Laboratory, Karolinska Institute                | C57BL/6J          | M   |                     |
| Mus Musculus<br><i>Nr1h3<sup>floxed/floxed</sup>Nr1h2<sup>floxed/floxed</sup></i><br><i>LysM-Cre</i><br>( <i>Lxrα<sup>fl/fl</sup>Lxrβ<sup>fl/fl</sup>-LysM-Cre</i> ) | Alan R. Tall Laboratory, Columbia University Irving Medical Center | C57BL/6J          | M   |                     |
| Mus Musculus<br>B6.129S7- <i>Ldlr<sup>tm1Her</sup>/J</i>                                                                                                             | The Jackson Laboratory, stock No: 002207                           | C57BL/6J          | M   |                     |

### Genetically Modified Animals

|                        | Species                                                                                                                                  | Vendor or Source                                    | Background Strain |
|------------------------|------------------------------------------------------------------------------------------------------------------------------------------|-----------------------------------------------------|-------------------|
| <b>Parent - Male</b>   | Mus Musculus<br>B6.129P2- <i>Lyz2<sup>tm1(cre)lfo</sup>/J</i>                                                                            | The Jackson Laboratory, Stock No: 004781            | C57BL/6J          |
| <b>Parent - Female</b> | Mus Musculus<br><i>Nr1h3<sup>floxed/floxed</sup>Nr1h2<sup>floxed/floxed</sup></i><br>( <i>Lxrα<sup>fl/fl</sup>Lxrβ<sup>fl/fl</sup></i> ) | Jan-Åke Gustafsson Laboratory, Karolinska Institute | C57BL/6J          |

### Antibodies

| Target antigen | Vendor or Source          | Catalog # | Working concentration | Persistent ID / URL  |
|----------------|---------------------------|-----------|-----------------------|----------------------|
| Mac-2          | Cedarlane                 | CL8942AP  | 1:10,000              | RRID:<br>AB_10060357 |
| Ki-67          | Vector Laboratories, Inc. | VP-K451   | 1:1,500               | RRID:<br>AB_2314701  |
| IL-1β          | Novus Biologicals         | NB600-633 | 1:100                 | RRID:<br>AB_10001060 |
| Ly6G           | BioLegend                 | 127602    | 2.5 μg/mL (1:200)     | RRID:<br>AB_1089180  |

|                                                   |                          |            |                   |                      |
|---------------------------------------------------|--------------------------|------------|-------------------|----------------------|
| MPO                                               | R&D Systems              | BAF3667    | 6.7 µg/mL (1:30)  | RRID:<br>AB_2146326  |
| Histone H3<br>(citrulline R2 + R8 + R17)          | Abcam                    | ab5103     | 1:300             |                      |
| 15-LOX                                            | Abcam                    | ab244205   | 1:1,000           |                      |
| 4-HNE                                             | Abcam                    | ab46545    | 1:500             | RRID:<br>AB_722490   |
| TREM-2                                            | Sigma-Aldrich            | MABN755    | 1:100             |                      |
| Caspase-1                                         | Thermo Fisher Scientific | 14-9832-82 | 1:250             | RRID:<br>AB_2016691  |
| CD16/32 Fc blocker                                | BioLegend                | 101302     | 16.7 µg/mL (1:30) | RRID:<br>AB_312801   |
| APC-Cy7-conjugated anti-CD45                      | BioLegend                | 103116     | 2 µg/mL (1:100)   | RRID:<br>AB_312981   |
| PE-Cy7-conjugated anti-CD11b                      | BioLegend                | 101216     | 1 µg/mL (1:200)   | RRID:<br>AB_312799   |
| BV421-conjugated anti-Gr-1                        | BioLegend                | 108434     | 1:200             | RRID:<br>AB_2562219  |
| FITC-conjugated anti-B220                         | BioLegend                | 103206     | 5 µg/mL (1:100)   | RRID:<br>AB_312991   |
| PerCP-Cy5.5-conjugated TCRβ                       | BioLegend                | 109228     | 2 µg/mL (1:100)   | RRID:<br>AB_1575173  |
| APC-conjugated anti-F4/80                         | BioLegend                | 123116     | 4 µg/mL (1:50)    | RRID:<br>AB_89348    |
| APC-conjugated anti-CD115                         | BioLegend                | 135532     | 4 µg/mL (1:50)    | RRID:<br>AB_2632740  |
| APC-conjugated anti-CD64                          | BioLegend                | 139306     | 4 µg/mL (1:50)    | RRID:<br>AB_11219391 |
| rat IgG (H+L), CF 647                             | Sigma-Aldrich            | SAB4600186 | 10 µg/mL (1:200)  |                      |
| Alexa Fluor (AF) 488-conjugated goat anti-rat IgG | Thermo Fisher Scientific | A-11006    | 2 µg/mL (1:1,000) | RRID:<br>AB_141373   |
| AF647-conjugated goat                             | Thermo Fisher            | A-21244    | 2 µg/mL (1:1,000) | RRID:<br>AB_2535812  |



|                             |                   |                |                  |                     |
|-----------------------------|-------------------|----------------|------------------|---------------------|
| anti-rabbit IgG             | Scientific        |                |                  |                     |
| rabbit IgG (H+L),<br>CF 647 | Sigma-<br>Aldrich | SAB46001<br>84 | 10 µg/mL (1:200) | RRID:<br>AB_2665437 |

### Other

| Description                                         | Source / Repository                     | Persistent ID / URL |
|-----------------------------------------------------|-----------------------------------------|---------------------|
| Western-type diet                                   | Harlan Teklad                           | TD88137             |
| Cholesterol E                                       | FUJIFILM Wako Pure Chemical Corporation |                     |
| IL-18 ELISA                                         | MBL                                     |                     |
| T0901317                                            | Cayman Chemical Company                 |                     |
| TRIzol Reagent                                      | Thermo Fisher Scientific                |                     |
| RNeasy Micro Kit                                    | Qiagen                                  |                     |
| First Strand cDNA Synthesis Kit for RT-qPCR         | Thermo Fisher Scientific                |                     |
| Fast Power SYBR Green PCR Master Mix reagent        | Thermo Fisher Scientific                |                     |
| ProLong Gold Antifade Mountant with DAPI reagent    | Thermo Fisher Scientific                |                     |
| AF488-conjugated streptavidin                       | Thermo Fisher Scientific                | S11223              |
| Clodronate liposome solution                        | Liposoma BV                             |                     |
| Fluoresbrite YG Microspheres 1.00 µm                | Polysciences, Inc.                      |                     |
| SMART-Seq v4 Ultra Low Input RNA Kit for Sequencing | TaKaRa Bio. Inc.                        |                     |
| Nextera XT DNA Library Preparation Kit              | Illumina                                |                     |
| BODIPY 493/503                                      | Thermo Fisher Scientific                |                     |
| Chromium library preparation system                 | 10x Genomics                            |                     |
